# Supplementary material for: Antibiotics after incision and drainage for uncomplicated skin abscesses: a clinical practice guideline
Source: PubMed Central journal article supplement — BMJ. 2018 Feb 6;360:k243. doi: 10.1136/bmj.k243 (PMC5799894; doi:10.1136/bmj.k243), 2018-02-06
Supplement: verm041772.w1.pdf [file verm041772.w1.pdf]

## **Appendix 1. Rapid Recommendation panel members**

Antibiotics for skin abscess: a clinical practice guideline

### Chair:

Bert Aertgeerts, MD, PhD

General practitioner

Academic Centre for General Practice, Department of Public Health and Primary Care, KU Leuven, Belgium

CEBAM, Belgian Centre for Evidence-Based Medicine, Cochrane Belgium, Leuven, Belgium

### Methods editor:

Reed A.C. Siemieniuk, MD

General internal medicine

PhD student

Department of Health Research Methods, Evidence and Impact, McMaster University, Hamilton, Ontario, Canada

Department of Medicine, University of Toronto, Toronto, Ontario, Canada

### Clinical experts:

Jako Burgers, MD, PhD

General practitioner

Dutch College of General Practitioners, Utrecht, The Netherlands

Care and Public Health Research Institute, Department Family Medicine, Maastricht, The Netherlands

Patrick Mbah Okwen, MD

General practitioner

Bali District Hospital, Bali and Centre for Development of Best practices in Health Yaounde, Cameroon

Rachelle Sender, MD

General practitioner

Department of Family Medicine, McMaster University Medical School, Hamilton, Ontario, Canada

Mieke Vermandere, MD, PhD

General practitioner

Academic Centre for General Practice, Department of Public Health and Primary Care, KU Leuven, Leuven, Belgium

Reinhart Speeckaert, MD

Dermatologist

Department of Dermatology, University of Ghent, Ghent, Belgium

Claudia Beltrán, MD  
Paediatric infectious diseases physician  
Department of Paediatrics, Universidad de Antioquia, Medellín, Colombia

Arnaud Merglen, MD, MSc  
Paediatrician  
Division of General Pediatrics, University Hospitals of Geneva & Faculty of Medicine,  
University of Geneva, Geneva, Switzerland

Valéry Lavergne, MD  
Medical microbiologist and infectious disease physician  
Infectious Disease Society of America  
Department of medical microbiology and infectious diseases, Sacré-Coeur Hospital, University  
of Montreal, Montreal, Quebec, Canada

Catherine Liu, MD  
Infectious disease physician  
Vaccine and Infectious Disease Division, Fred Hutchinson Cancer Research Center and Division  
of Allergy and Infectious Diseases, University of Washington, Washington, DC, USA

Shelley McLeod, MD  
Emergency medicine research director  
PhD student  
Schwartz/Reisman Emergency Medicine Institute, Sinai Health System, Toronto, Ontario,  
Canada  
Department of Family and Community Medicine, University of Toronto, Toronto, Ontario,  
Canada  
Department of Health Research Methods, Evidence, and Impact, McMaster University,  
Hamilton, Ontario, Canada

Thomas Agoritsas, MD, PhD  
General internal medicine  
Expert in shared decision making research  
Division General Internal Medicine & Division of Clinical Epidemiology, University Hospitals  
of Geneva, Geneva, Switzerland  
Department of Health Research Methods, Evidence and Impact, McMaster University, Hamilton,  
Canada

Per Olav Vandvik, MD, PhD  
General internal medicine  
Institute of Health and Society, Faculty of Medicine, University of Oslo, Oslo, Norway  
Department of Medicine, Innlandet Hospital Trust-division, Gjøvik, Norway  
Norwegian Institute of Public Health, Oslo, Norway

Patient/carer partners:

Victoria Arteaga  
Mother of a patient  
Medellín, Colombia

Shunjie Chua  
Cochrane Consumer Group  
MOH Holdings, 1 Maritime Square, Singapore, Singapore 099253

Finn E. Steen  
BI Norwegian Business School, Oslo, Norway

Methodology and research content experts:

Gordon H. Guyatt, MD, MSc  
General internal medicine  
Guideline expert, methodologist  
Department of Medicine and Department of Health Research Methods, Evidence, and Impact,  
McMaster University, Hamilton, Ontario, Canada

Lyubov Lytvyn, MSc  
Patient partnership expert, methodologist  
PhD student  
Department of Health Research Methods, Evidence and Impact, McMaster University, Hamilton,  
Canada
