# Supplementary material for: Antibiotics after incision and drainage for uncomplicated skin abscesses: a clinical practice guideline
Source: PubMed Central journal article supplement — BMJ. 2018 Feb 6;360:k243. doi: 10.1136/bmj.k243 (PMC5799894; doi:10.1136/bmj.k243), 2018-02-06
Supplement: verm041772.wi.pdf [file verm041772.wi.pdf]

Static screenshot of the fully-expanded graphic

Contextual information, which will only be provided when viewer interacts with these elements (by hovering the mouse or touching the screen)

### Population

This recommendation applies to almost all patients with skin abscesses:

- Children and adults
- Smaller and larger abscesses
- Unknown or unconfirmed pathogens
- Emergency and primary care settings

However the recommendation is **not** applicable to patients with:

- Evidence of systemic illness (sepsis)
- Pustules and papules
- Deep tissue infections
- Hidradenitis suppurativa
- Immunocompromising conditions
- Patients who do not undergo incision and drainage

### Comparison 1

**No antibiotics** (Incision and drainage alone) OR **Antibiotics** (Incision and drainage plus trimethoprim and sulfamethoxazole or clindamycin)

**Applies to:** All

**Strength:** Strong (Antibiotics) / Weak (No antibiotics)

**Recommendation:** We suggest TMP-SMX or clindamycin plus incision and drainage rather than incision and drainage alone. Discuss both options with each patient.

#### Comparison of benefits and harms

| Outcome                       | No antibiotics         | Antibiotics             | Evidence quality |
|-------------------------------|------------------------|-------------------------|------------------|
| Outcomes (1 month)            | Events per 1000 people | Events per 1000 people  |                  |
| Treatment failure             | 90                     | 47 fewer                | High             |
| Recurrence                    | 129                    | 63 fewer                | Moderate         |
| Invasive infections           | 4                      | No important difference | Moderate         |
| Outcomes (3-4 days)           | Events per 1000 people | Events per 1000 people  |                  |
| Pain/Tenderness               | 559                    | 68 fewer                | Moderate         |
| Side effects (TMP-SMX)        | Events per 1000 people | Events per 1000 people  |                  |
| Gastrointestinal side effects | 65                     | 21 fewer                | Moderate         |
| Nausea                        | 24                     | 11 fewer                | Moderate         |
| Diarrhoea                     | 67                     | No important difference | Moderate         |
| Side effects (clindamycin)    | Events per 1000 people | Events per 1000 people  |                  |
| Gastrointestinal side effects | 90                     | 95 fewer                | Moderate         |
| Nausea                        | 24                     | No important difference | Moderate         |
| Diarrhoea                     | 67                     | 96 fewer                | Moderate         |

#### Key practical issues

| Issue                  | No antibiotics                                                                                                                                                                                                                                                                         | Antibiotics                                                                                                                                                                             |
|------------------------|----------------------------------------------------------------------------------------------------------------------------------------------------------------------------------------------------------------------------------------------------------------------------------------|-----------------------------------------------------------------------------------------------------------------------------------------------------------------------------------------|
| Practical issues       | No practical issues                                                                                                                                                                                                                                                                    | Typically taken 2-3 times daily, for 5-10 days                                                                                                                                          |
| Preferences and values | Different people probably place different values on the expected consequences (both desirable and undesirable) of taking antibiotics. Different individuals are likely to choose different treatment options. Shared decision making is needed to elicit these values and preferences. |                                                                                                                                                                                         |
| Antibiotic resistance  |                                                                                                                                                                                                                                                                                        | Antibiotic use increases antibiotic resistance in the community and in recurrent infections in the individual. However, the impact of a single course of antibiotics is very uncertain. |

Benefits outweigh harms for the majority, but not for everyone. The majority of patients would likely want this option

Benefits outweigh harms for almost everyone. All or nearly all informed patients would likely want this option

The panel found that this difference was not important for most patients, because the intervention effects were negligible and/or very imprecise (such as statistically not significant)

This section is hidden until the "more" button is clicked

This section is hidden until the "more" button is clicked

This section is hidden until the "more" button is clicked

This section is hidden until the "more" button is clicked

This section is hidden until the recommendation is clicked

This section is hidden until the "more" button is clicked

This section is hidden until the "more" button is clicked

This section is hidden until the "more" button is clicked

This section is hidden until the "more" button is clicked

This section is hidden until the "more" button is clicked

### Comparison 2

For patients who have chosen to initiate antibiotics:

**Trimethoprim and sulfamethoxazole or clindamycin** OR **Cephalosporins** (First and second generation cephalosporins)

**Applies to:** Those initiating antibiotics

**Strength:** Strong (Trimethoprim and sulfamethoxazole or clindamycin) / Weak (Cephalosporins)

**Recommendation:** We recommend trimethoprim and sulfamethoxazole or clindamycin over cephalosporins.

#### Comparison of benefits and harms

| Outcome                   | Trimethoprim and sulfamethoxazole or clindamycin | Cephalosporins          | Evidence quality |
|---------------------------|--------------------------------------------------|-------------------------|------------------|
| 1 month Treatment failure | 119                                              | 162 fewer               | Moderate         |
| 1 month Treatment failure | 109                                              | 171 fewer               | Moderate         |
| 1 month Treatment failure | 180                                              | No important difference | Moderate         |

#### Key practical issues

| Issue                   | Trimethoprim and sulfamethoxazole                                                                                                               | Cephalosporins                                                                                                                                                     |
|-------------------------|-------------------------------------------------------------------------------------------------------------------------------------------------|--------------------------------------------------------------------------------------------------------------------------------------------------------------------|
| Practical issues        | 2 pills, 2 times per day<br>Typically less expensive                                                                                            | 1 pill 2-4 times per day<br>Typically more expensive                                                                                                               |
| MRSA                    | This strong recommendation applies to the most common situation where the risk of methicillin-resistant Staphylococcus aureus is more than 10%. |                                                                                                                                                                    |
| Adverse effects         | Adverse effects differ between antibiotics.                                                                                                     |                                                                                                                                                                    |
| Evidence interpretation |                                                                                                                                                 | The basis for this recommendation is that cephalosporins are probably less effective than TMP-SMX and clindamycin and they may not be more effective than placebo. |

Benefits outweigh harms for the majority, but not for everyone. The majority of patients would likely want this option

Benefits outweigh harms for almost everyone. All or nearly all informed patients would likely want this option

The panel found that this difference was not important for most patients, because the intervention effects were negligible and/or very imprecise (such as statistically not significant)

The panel found that this difference was not important for most patients, because the intervention effects were negligible and/or very imprecise (such as statistically not significant)

The panel found that this difference was not important for most patients, because the intervention effects were negligible and/or very imprecise (such as statistically not significant)

This section is hidden until the recommendation is clicked

This section is hidden until the "more" button is clicked

This section is hidden until the "more" button is clicked

This section is hidden until the "more" button is clicked

### Comparison 3

For patients who have chosen to initiate antibiotics:

**Clindamycin** OR **Trimethoprim and sulfamethoxazole**

**Applies to:** Those initiating antibiotics

**Strength:** Strong (Trimethoprim and sulfamethoxazole) / Weak (Clindamycin)

**Recommendation:** We suggest trimethoprim and sulfamethoxazole over clindamycin. Discuss with patients in shared decision making.

#### Comparison of benefits and harms

| Outcome                   | Clindamycin | Trimethoprim and sulfamethoxazole | Evidence quality |
|---------------------------|-------------|-----------------------------------|------------------|
| 1 month Treatment failure | 109         | 119                               | High             |
| Early recurrence          | 68          | 67 fewer                          | Low              |
| Diarrhoea                 | 162         | 109 fewer                         | High             |
| Nausea                    | 23          | 43                                | Moderate         |

#### Key practical issues

| Issue                  | Clindamycin                                                                                                                                                                                                                                                                            | Trimethoprim and sulfamethoxazole                                                                                    |
|------------------------|----------------------------------------------------------------------------------------------------------------------------------------------------------------------------------------------------------------------------------------------------------------------------------------|----------------------------------------------------------------------------------------------------------------------|
| Practical issues       | 2 pills, 3 times per day<br>Typically more expensive                                                                                                                                                                                                                                   | 2 pills, 2 times per day<br>Typically less expensive                                                                 |
| Preferences and values | Different people probably place different values on the expected consequences (both desirable and undesirable) of taking antibiotics. Different individuals are likely to choose different treatment options. Shared decision making is needed to elicit these values and preferences. |                                                                                                                      |
| Antibiotic resistance  |                                                                                                                                                                                                                                                                                        | Consider local resistance patterns when choosing the antibiotic as susceptibility patterns can differ substantially. |

Benefits outweigh harms for the majority, but not for everyone. The majority of patients would likely want this option

Benefits outweigh harms for almost everyone. All or nearly all informed patients would likely want this option

The panel found that this difference was not important for most patients, because the intervention effects were negligible and/or very imprecise (such as statistically not significant)

This section is hidden until the "more" button is clicked

This section is hidden until the "more" button is clicked

This section is hidden until the "more" button is clicked

This section is hidden until the "more" button is clicked
